# Supplementary material
Source: PubMed Central journal article supplement (PMC4422106)
Supplement: NIHMS675370-supplement-1.pdf [file NIHMS675370-supplement-1.pdf]

## Supplementary Figures

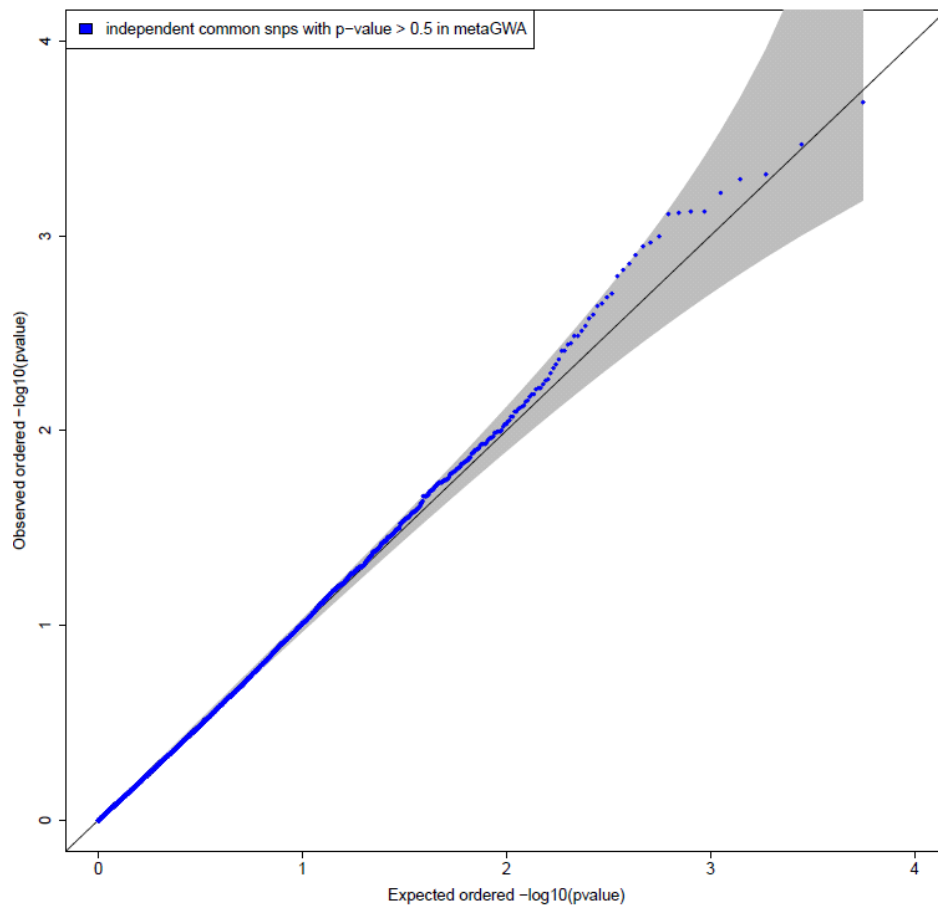

**Supplementary Figure 1. Quantile-Quantile (Q-Q) plot for the association result of the combined Immuchip dataset (GAPC+PAGE).** Only common ( $MAF \geq 1\%$ ) independent markers with  $p^{GWA} \geq 0.5$  were used. The genomic inflation factor was estimated to be 0.96, indicating the population stratification was well-adjusted.

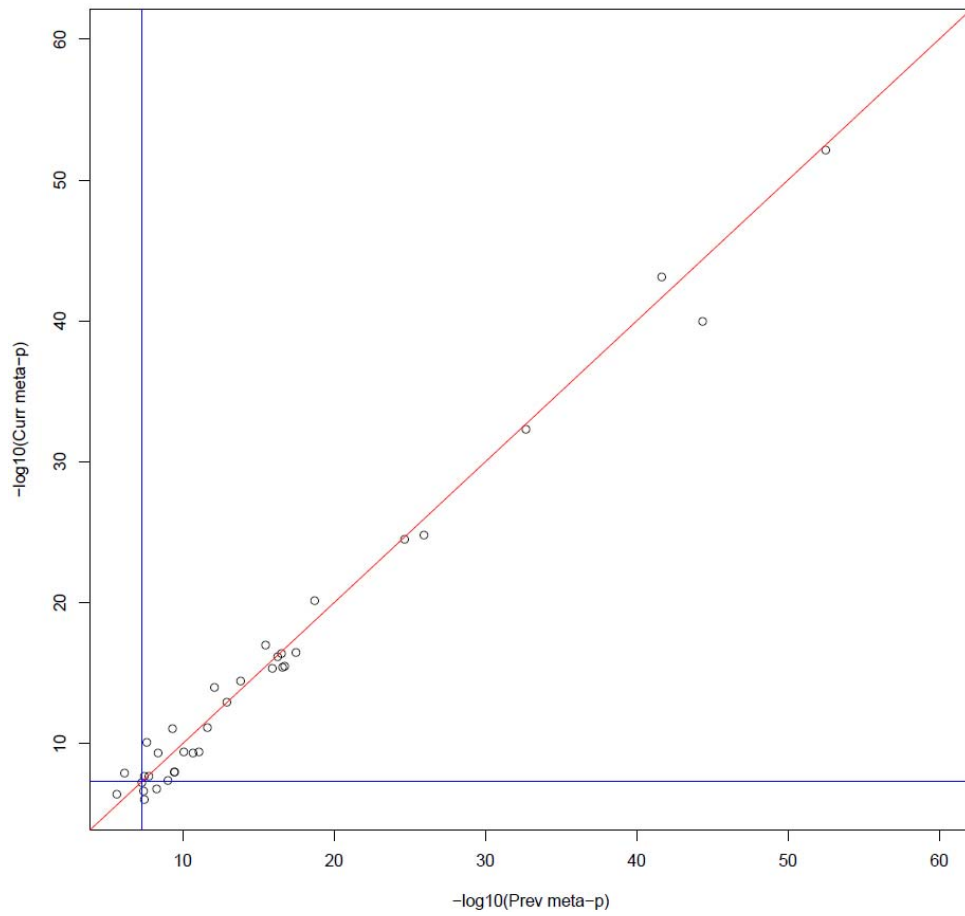

**Supplementary Figure 2. Comparison of p-values computed from the previous meta-analysis (x-axis) versus the current discovery meta-analysis (y-axis).** Circles indicate the best markers from the known psoriasis loci identified in Tsoi et al., 2012. Blue lines represent genomewide significance level ( $5 \times 10^{-8}$ ).

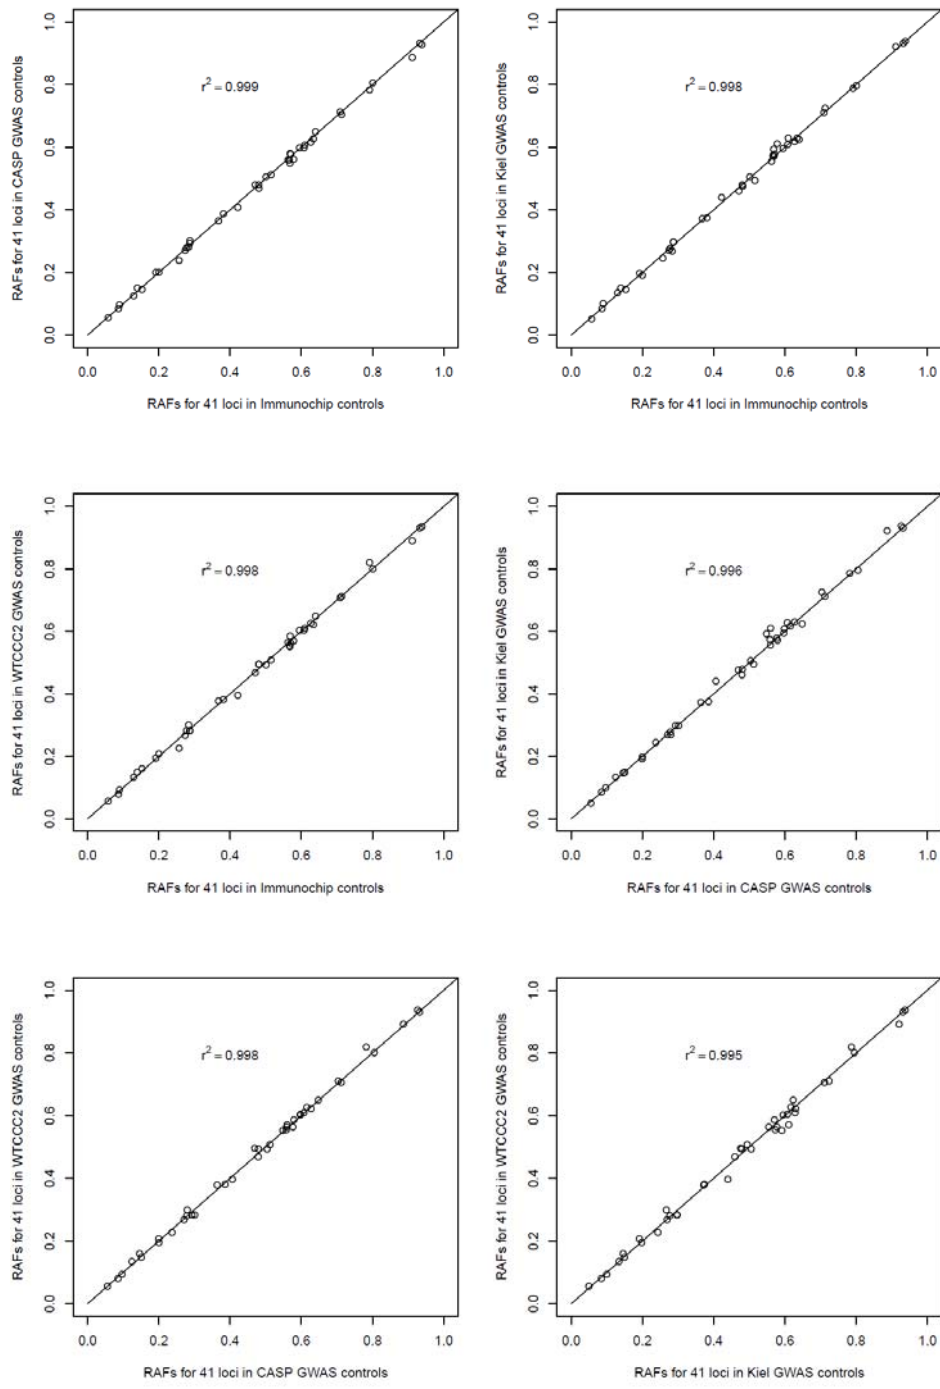

**Supplementary Figure 3. Pairwise comparisons of risk allele frequencies for the 41 known psoriasis loci between the controls of different studies.**

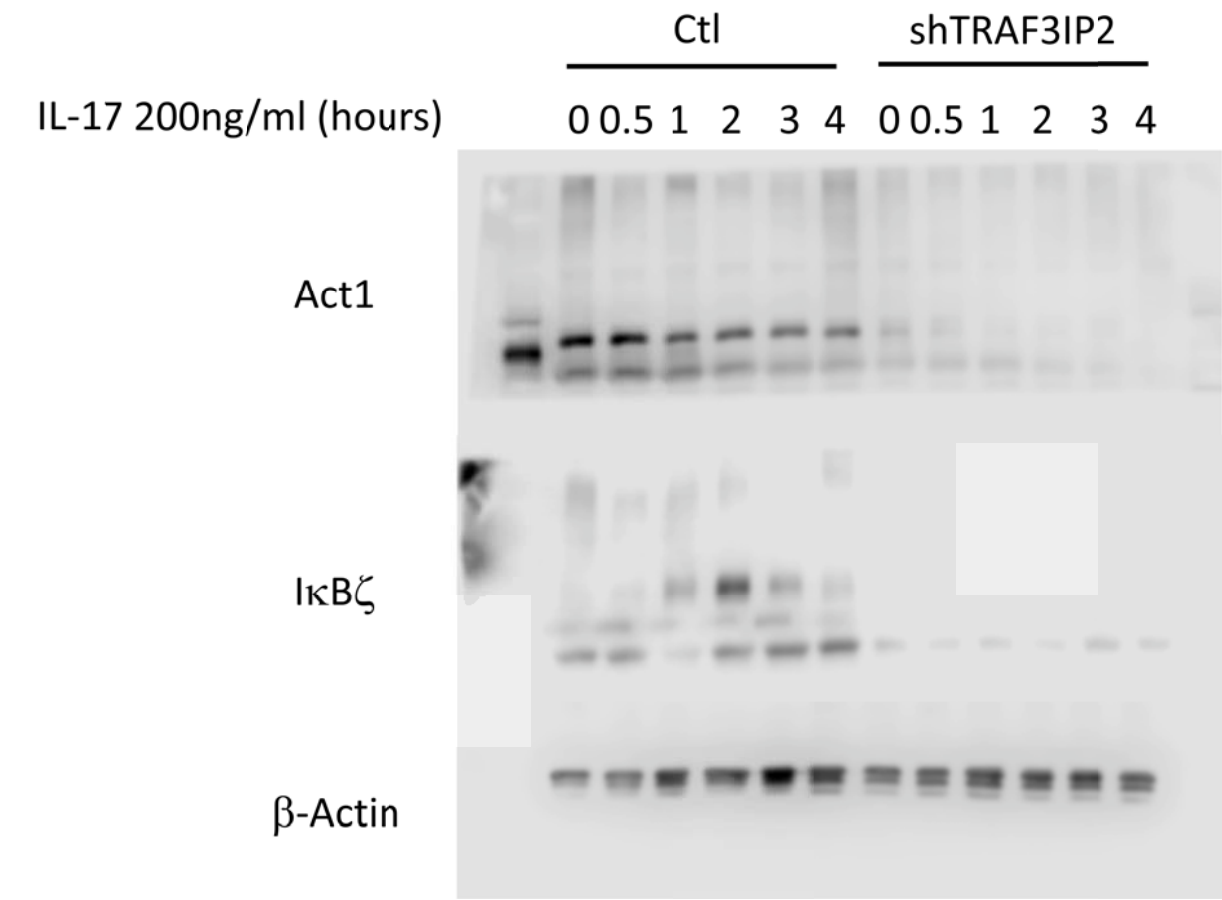

**Supplementary Figure 4. The uncropped scans for the Western blot analysis of time courses of IκB-zeta and Act1 expressions.**

**Supplementary Tables**

**Supplementary Table 1. The best signals from the novel loci identified in the current discovery meta-analysis and the original meta-analysis.**

| Region            | Current best signal |                       |                                                       | Original best signal in the novel loci |                                                        |                                                       |                              |                             |
|-------------------|---------------------|-----------------------|-------------------------------------------------------|----------------------------------------|--------------------------------------------------------|-------------------------------------------------------|------------------------------|-----------------------------|
|                   | Current Best signal | Original meta p-value | Current meta P-value (effective sample size weighted) | Original best signal                   | Original meta P-value (effective sample size weighted) | Current meta p-value (effective sample size weighted) | Original Imm p-value (EMMAX) | Current Imm p-value (EMMAX) |
| Intergenic        | chr1:69788482       | NA                    | 1.43E-08                                              | chr1:69779437                          | 3.67E-07                                               | 1.73E-08                                              | 7.74E-05                     | 9.69E-06                    |
| PLCL2 (intronic)  | chr3:16996035       | NA                    | 8.58E-09                                              | chr3:17019857                          | 3.51E-07                                               | 5.09E-08                                              | 4.43E-04                     | 3.51E-05                    |
| NFKBIZ (intronic) | chr3:101663555      | NA                    | 2.07E-09                                              | chr3:10163564                          | 8.02E-08                                               | 2.82E-09                                              | 8.02E-08                     | 1.89E-09                    |
| Intergenic        | chr5:40370724       | NA                    | 1.27E-08                                              | chr5:40398923                          | 5.14E-07                                               | 2.55E-08                                              | 7.30E-05                     | 1.25E-05                    |
| CAMK2G (intronic) | chr10:75599127      | NA                    | 7.35E-09                                              | chr10:75658349                         | 1.25E-06                                               | 3.03E-07                                              | 7.29E-05                     | 1.94E-05                    |
| AKAP13 (intronic) | chr15:86079115      | NA                    | 3.10E-08                                              | chr15:86075417                         | 1.28E-06                                               | 3.65E-08                                              | 1.08E-02                     | 1.54E-03                    |

**Supplementary Table 2. Imputation quality, summary statistics, and heterogeneity p-values for the best signals identified in the loci reaching genomewide significance in the discovery meta-analysis.**

|                       | ImmunoChip (PAGE+GAPC):<br>6,268 cases and 14,172 controls |       |      |      |              | CASP GWAS:<br>1,352 cases and 1,389 controls |      |      |      |                 | Kiel GWAS:<br>464 cases and 1,135 controls |      |      |      |                 | WTCCC2:<br>2,178 cases and 5,175 controls |      |      |      |                 | Meta                                        |          |
|-----------------------|------------------------------------------------------------|-------|------|------|--------------|----------------------------------------------|------|------|------|-----------------|--------------------------------------------|------|------|------|-----------------|-------------------------------------------|------|------|------|-----------------|---------------------------------------------|----------|
|                       | RAF                                                        |       |      |      |              | RAF                                          |      |      |      |                 | RAF                                        |      |      |      |                 | RAF                                       |      |      |      |                 |                                             |          |
|                       | Case                                                       | Cont  | r2   | ORs  | p<br>(EMMAX) | Case                                         | Cont | r2   | ORs  | p<br>(logistic) | Case                                       | Cont | r2   | ORs  | p<br>(logistic) | Case                                      | Cont | r2   | ORs  | p<br>(logistic) | p<br>(effective<br>sample size<br>weighted) | Het-p    |
| <b>chr1:69788482</b>  | 0.295                                                      | 0.257 | 0.82 | 1.11 | 9.30E-06     | 0.25                                         | 0.24 | 0.98 | 1.12 | 7.51E-02        | 0.26                                       | 0.24 | 0.99 | 1.12 | 2.18E-01        | 0.24                                      | 0.23 | 0.99 | 1.14 | 4.08E-03        | 1.43E-08                                    | 9.99E-01 |
| <b>chr3:16996035</b>  | 0.493                                                      | 0.481 | 0.88 | 1.12 | 2.16E-05     | 0.51                                         | 0.47 | 0.97 | 1.16 | 6.13E-03        | 0.50                                       | 0.48 | 0.96 | 1.09 | 2.91E-01        | 0.52                                      | 0.49 | 0.97 | 1.11 | 5.01E-03        | 8.58E-09                                    | 8.04E-01 |
| <b>chr3:101663555</b> | 0.829                                                      | 0.801 | 0.77 | 1.17 | 2.34E-09     | 0.83                                         | 0.80 | 1.00 | 1.16 | 3.69E-02        | 0.80                                       | 0.80 | 0.99 | 1.05 | 6.21E-01        | 0.82                                      | 0.80 | 0.99 | 1.05 | 2.90E-01        | 2.07E-09                                    | 1.46E-01 |
| <b>chr5:40370724</b>  | 0.929                                                      | 0.911 | 0.91 | 1.16 | 5.83E-06     | 0.91                                         | 0.89 | 0.94 | 1.39 | 5.23E-04        | 0.94                                       | 0.92 | 0.90 | 1.45 | 2.35E-02        | 0.89                                      | 0.89 | 0.93 | 1.07 | 2.63E-01        | 1.27E-08                                    | 1.01E-01 |
| <b>chr10:75599127</b> | 0.575                                                      | 0.563 | 0.70 | 1.12 | 1.83E-05     | 0.60                                         | 0.56 | 0.91 | 1.20 | 1.43E-03        | 0.60                                       | 0.55 | 0.99 | 1.20 | 2.45E-02        | 0.58                                      | 0.56 | 0.98 | 1.08 | 5.20E-02        | 7.35E-09                                    | 3.24E-01 |
| <b>chr15:86079115</b> | 0.370                                                      | 0.349 | 0.93 | 1.06 | 1.23E-03     | 0.36                                         | 0.33 | 0.97 | 1.18 | 4.87E-03        | 0.38                                       | 0.36 | 0.99 | 1.17 | 7.23E-02        | 0.35                                      | 0.32 | 0.98 | 1.16 | 2.34E-04        | 3.10E-08                                    | 2.87E-01 |

**Supplementary Table 3. Detailed results for the replication and combined association analysis of the novel loci.**

| Discovery meta-analysis                                  |    |      |                                       | Replication                           |    |      |                 |                                           |    |      |                 |                                  |    |      |                 | Combined                             |    |      |                 |                                           |         |
|----------------------------------------------------------|----|------|---------------------------------------|---------------------------------------|----|------|-----------------|-------------------------------------------|----|------|-----------------|----------------------------------|----|------|-----------------|--------------------------------------|----|------|-----------------|-------------------------------------------|---------|
| 3GWAS+Imm: 10,262 case+21,871controls                    |    |      |                                       | Exomechip 1: 913 cases+1,494 controls |    |      |                 | Exomechip 2: 3,168 cases + 2,864 controls |    |      |                 | PsA GWAS: 191 cases+356 controls |    |      |                 | Genizon GWAS: 761 cases+993 controls |    |      |                 | 15,295 cases + 27,578 controls            |         |
| Marker                                                   | RA | ORs  | P<br>(effective sample size weighted) | Marker                                | RA | ORs  | P<br>(logistic) | Marker                                    | RA | ORs  | P<br>(logistic) | Marker                           | RA | ORs  | P<br>(logistic) | Marker                               | RA | ORs  | P<br>(logistic) | MetaP<br>(effective sample size weighted) | MetaDir |
|                                                          |    |      | chr1:69788482                         |                                       |    |      | G               |                                           |    |      | 1.12            |                                  |    |      | 1.43E-08        |                                      |    |      | NA              |                                           |         |
| chr3:16996035                                            | G  | 1.12 | 8.58E-09                              | chr3:17080974                         | A  | 1.24 | 3.63E-04        | chr3:17080974                             | A  | 1.12 | 1.78E-03        | chr3:17016794                    | A  | 1.10 | 4.39E-01        | chr3:17019857                        | C  | 1.13 | 6.82E-02        | 7.23E-14                                  | ++++    |
| chr3:101663555                                           | A  | 1.14 | 2.07E-09                              | chr3:101663555                        | A  | 1.20 | 2.14E-02        | chr3:101663555                            | A  | 1.02 | 6.72E-01        | chr3:101635645                   | G  | 1.38 | 5.47E-02        | chr3:101635645                       | G  | 1.15 | 1.12E-01        | 1.66E-10                                  | ++++    |
| chr5:40370724                                            | C  | 1.17 | 1.27E-08                              | chr5:40385142                         | T  | 1.08 | 5.08E-01        | chr5:40385142                             | T  | 1.10 | 1.62E-01        | chr5:40373134                    | T  | 1.02 | 9.25E-01        | chr5:40379350                        | C  | 1.16 | 2.36E-01        | 5.68E-09                                  | ++++    |
| chr10:75599127                                           | A  | 1.12 | 7.35E-09                              | chr10:75632760                        | T  | 1.12 | 6.03E-02        | chr10:75632760                            | T  | 1.21 | 2.46E-07        | chr10:75620757                   | T  | 1.18 | 2.01E-01        | chr10:75632760                       | T  | 1.08 | 2.33E-01        | 1.58E-14                                  | ++++    |
| chr15:86079115                                           | G  | 1.10 | 3.10E-08                              | chr15:86075417                        | A  | 1.00 | 9.87E-01        | chr15:86075417                            | G  | 1.01 | 8.69E-01        | chr15:86054490                   | T  | 1.55 | 1.25E-03        | chr15:86075417                       | A  | 1.01 | 8.61E-01        | 1.71E-06                                  | ++-     |
| <b>Michigan Genotyping: 3,030 cases + 2,859 controls</b> |    |      |                                       |                                       |    |      |                 |                                           |    |      |                 |                                  |    |      |                 |                                      |    |      |                 |                                           |         |
| P                                                        |    |      |                                       |                                       |    |      |                 |                                           |    |      |                 |                                  |    |      |                 |                                      |    |      |                 |                                           |         |
| Marker RA ORs (logistic)                                 |    |      |                                       |                                       |    |      |                 |                                           |    |      |                 |                                  |    |      |                 |                                      |    |      |                 |                                           |         |
| chr3:16996035                                            | G  | 1.12 | 8.58E-09                              | chr3:17080974                         | A  | 1.24 | 3.63E-04        | chr3:16996035                             | G  | 1.12 | 9.20E-05        |                                  |    |      |                 | chr3:17019857                        | C  | 1.13 | 6.82E-02        | 8.95E-15                                  | ++++    |

**Supplementary Table 4. Psoriasis susceptibility loci identified in European-origin (EUR), Chinese-origin (CHN), or both populations. The five novel loci identified in this study are marked with an asterisk(\*).**

| <b>Locus</b> | <b>Population</b> | <b>Notable nearby genes</b>  |
|--------------|-------------------|------------------------------|
| 1p36.23      | EUR               | <i>SLC45A1, TNFRSF9</i>      |
| 1p36         | BOTH              | <i>IL28RA</i>                |
| 1p36.11      | EUR               | <i>RUNX3</i>                 |
| 1p31.3       | BOTH              | <i>IL23R</i>                 |
| 1q31.1*      | EUR               | <i>LRRC7</i>                 |
| 1q21.3       | BOTH              | <i>LCE3B, LCE3D</i>          |
| 2p16.1       | EUR               | <i>FLJ16341, REL</i>         |
| 2p15         | EUR               | <i>B3GNT2</i>                |
| 2q24         | BOTH              | <i>KCNH7, IFIH1</i>          |
| 3p24.3*      | EUR               | <i>PLCL2</i>                 |
| 3q12.3*      | EUR               | <i>NFKBIZ</i>                |
| 4q24         | CHN               | <i>NFKB1</i>                 |
| 5p13.1*      | EUR               | <i>PTGER4, CARD6</i>         |
| 5q15         | BOTH              | <i>ERAP1, LNPEP</i>          |
| 5q31.1       | EUR               | <i>IL13, IL4</i>             |
| 5q33.1       | BOTH              | <i>TNIP1</i>                 |
| 5q33.3       | BOTH              | <i>IL12B</i>                 |
| 5q33.3       | CHN               | <i>PTTG1</i>                 |
| 6p25.3       | EUR               | <i>EXOC2, IRF4</i>           |
| 6p21         | BOTH              | <i>HLA-B, HLA-C</i>          |
| 6q21         | EUR               | <i>TRAF3IP2</i>              |
| 6q23.3       | EUR               | <i>TNFAIP3</i>               |
| 6q25.3       | EUR               | <i>TAGAP</i>                 |
| 7p14.1       | EUR               | <i>ELMO1</i>                 |
| 8p23.2       | CHN               | <i>CSMD1</i>                 |
| 9p21.1       | EUR               | <i>DDX58</i>                 |
| 9q31.2       | EUR               | <i>KLF4</i>                  |
| 10q22.2*     | EUR               | <i>CAMK2G, FUT11</i>         |
| 10q22.3      | EUR               | <i>ZMIZ1</i>                 |
| 11q13.1      | EUR               | <i>RPS6KA4, PRDX5</i>        |
| 11q22.3      | EUR               | <i>ZC3H12C</i>               |
| 11q24.3      | EUR               | <i>ETS1</i>                  |
| 12p13.3      | CHN               | <i>CD27-LAG3</i>             |
| 12q13.3      | EUR               | <i>STAT2, IL23A</i>          |
| 13q12.11     | CHN               | <i>GJB2</i>                  |
| 14q13        | BOTH              | <i>NFKBIA</i>                |
| 16p13.13     | EUR               | <i>PRM3, SOCS1</i>           |
| 16p11.2      | EUR               | <i>PRSS53, FBXL19</i>        |
| 17q11.2      | EUR               | <i>NOS2</i>                  |
| 17q12        | CHN               | <i>IKZF3</i>                 |
| 17q21.2      | EUR               | <i>PTRF, STAT3, STAT5A/B</i> |
| 17q25.3      | EUR               | <i>CARD14</i>                |
| 18q21.2      | EUR               | <i>POL1, STARD6, MBD2</i>    |
| 18q22.1      | CHN               | <i>SERPINB8</i>              |
| 19p13.2      | EUR               | <i>TYK2</i>                  |
| 19p13.2      | EUR               | <i>ILF3, CARM1</i>           |
| 19q13.41     | CHN               | <i>ZNF816A</i>               |
| 20q13.13     | EUR               | <i>RNF114</i>                |
| 22q11.21     | EUR               | <i>UBE2L3</i>                |



**Supplementary Table 5. Genomic features from lymphoblastoids and keratinocytes overlapping with the identified novel loci.**

| Cell    | Genomic Features | 3p24.3 | 3q12.3 | 5p13.1 | 10q22.2 |
|---------|------------------|--------|--------|--------|---------|
| GM12878 | H3K27ac          | X      | X      |        | X       |
|         | H3K36me3         | X      |        |        | X       |
|         | H3K4me1          | X      | X      | X      | X       |
|         | H3K4me2          | X      | X      | X      | X       |
|         | H3K79me2         | X      |        |        | X       |
|         | H3K9me3          | X      | X      | X      |         |
|         | H4K20me1         | X      |        |        | X       |
|         | H3K4me3          |        | X      |        | X       |
|         | H3K9ac           |        |        |        | X       |
|         | BATF             | X      | X      |        | X       |
| BCL11A  | X                | X      |        |        |         |
| BCL3    | X                |        |        |        |         |
| IRF4    | X                | X      |        |        |         |
| JunD    | X                |        |        |        |         |
| MEF2A   | X                |        |        |        |         |
| NFKB    | X                | X      |        |        |         |
| RXRA    | X                |        |        |        |         |
| PU.1    |                  | X      |        |        |         |
| EBF     |                  |        |        | X      |         |
| EBF1    |                  |        |        | X      |         |
| NHEK    | H3K36me3         |        |        |        | X       |
|         | H3K4me3          |        |        |        | X       |
|         | H3K27ac          | X      | X      | X      | X       |
|         | H3K4me1          | X      | X      | X      | X       |
|         | H3K4me2          | X      | X      | X      | X       |
|         | H3K9ac           |        | X      | X      | X       |

**Supplementary Table 6. Quality measurements for each dataset in the discovery meta-analysis.**

|                    | <u>Sample call rate</u> |            | <u>Marker call rate</u> |            | <u>Min MAF</u> | <u># of markers</u> | <u>well-imputed and non-rare markers</u> |
|--------------------|-------------------------|------------|-------------------------|------------|----------------|---------------------|------------------------------------------|
|                    | <u>Avg</u>              | <u>Min</u> | <u>Avg</u>              | <u>Min</u> |                |                     |                                          |
| <b>ImmunoChip</b>  | 1.00                    | 0.99       | 1.00                    | 0.97       | 2.45E-05       | 170,637             | 759,972                                  |
| <b>CASP GWAS</b>   | 0.99                    | 0.96       | 0.99                    | 0.95       | 9.50E-03       | 438,609             | 7,268,506                                |
| <b>Kiel GWAS</b>   | 1.00                    | 0.95       | 1.00                    | 0.95       | 1.94E-02       | 504,637             | 7,521,945                                |
| <b>WTCCC2 GWAS</b> | 1.00                    | 0.97       | 1.00                    | 0.98       | 1.00E-02       | 528,089             | 7,597,164                                |

## **Supplementary Note 1: Membership of Contributing Consortia**

### **Collaborative Association Study of Psoriasis (CASP)**

Rajan P. Nair<sup>1\*</sup>, Kristina Callis Duffin<sup>2\*</sup>, Cindy Helms<sup>3\*</sup>, Jun Ding<sup>4\*</sup>, Philip E. Stuart<sup>1</sup>, David Goldgar<sup>2</sup>, Johann E. Gudjonsson<sup>1</sup>, Yun Li<sup>4</sup>, Trilokraj Tejasvi<sup>1</sup>, Justin Paschall<sup>17</sup>, M. J. Malloy<sup>18</sup>, C. R. Pullinger<sup>18</sup>, J. P. Kane<sup>18</sup>, J. Gardner<sup>3</sup>, A. Perlmutter<sup>19</sup>, A. Miner<sup>19</sup>, Bing Jian Feng<sup>2</sup>, Ravi Hiremagalore<sup>1</sup>, Robert W. Ike<sup>20</sup>, Henry W. Lim<sup>21</sup>, Enno Christophers<sup>6</sup>, Tilo Henseler<sup>6</sup>, Stefan Schreiber<sup>22,23</sup>, Andre Franke<sup>22</sup>, Andreas Ruether<sup>5</sup>, Michael Weichenthal<sup>6</sup>, Dafna Gladman<sup>7</sup>, Proton Rahman<sup>8</sup>, Steven J. Schrod<sup>9</sup>, Sampath Prahalad<sup>10</sup>, Stephen L Guthery<sup>10</sup>, Judith Fischer<sup>11</sup>, Wilson Liao<sup>12</sup>, Pui Kwok<sup>12</sup>, Alan Menter<sup>13</sup>, G. Mark Lathrop<sup>11</sup>, C. Wise<sup>14</sup>, Ann B. Begovich<sup>9</sup>, John J. Voorhees<sup>1</sup>, Utah Psoriasis Initiative, James T. Elder<sup>1,15</sup>, Gerald G. Krueger<sup>2</sup>, Anne M. Bowcock<sup>3</sup>, Gonçalo R. Abecasis<sup>4</sup>

<sup>1</sup> Department of Dermatology, University of Michigan, Ann Arbor, MI; <sup>2</sup> Department of Dermatology, University of Utah, Salt Lake City, UT; <sup>3</sup> Division of Human Genetics, Department of Genetics, Washington University at St. Louis, St. Louis, MO; <sup>4</sup> Center for Statistical Genetics, Department of Biostatistics, University of Michigan, Ann Arbor, MI <sup>5</sup> Institute for Clinical Molecular Biology, University of Kiel, Kiel, Germany; <sup>6</sup> Department of Dermatology, University of Kiel, Kiel, Germany; <sup>7</sup> Department of Rheumatology, University of Toronto, Toronto, Ontario; <sup>8</sup> Department of Medicine, Memorial University, St. John's, Newfoundland; <sup>9</sup> Celera, 1401 Harbor Bay Parkway, Alameda, CA; <sup>10</sup> Departments of Pediatrics, Rheumatology and Gastroenterology, University of Utah, Salt Lake City, UT; <sup>11</sup> Centre National de Génotypage, Institut Génomique, Commissariat à l'Énergie Atomique, Evry, France; <sup>12</sup> Department of Dermatology, University of California, San Francisco; <sup>13</sup> Department of Dermatology, Baylor University Medical Center, Dallas, TX; <sup>14</sup> Seay Center for Musculoskeletal Research, Texas Scottish Rite Hospital for Children, Dallas, TX; <sup>15</sup> Ann Arbor Veterans Affairs Hospital, Ann Arbor, MI; <sup>17</sup> National Center for Biotechnology Information, National Library of Medicine, National Institutes of Health, Bethesda, Maryland, USA; <sup>18</sup> Cardiovascular Research Institute and Center for Human Genetics, University of California-San Francisco, CA; <sup>19</sup> Department of Psychiatry, Washington University School of Medicine, St. Louis, MO; <sup>20</sup> Department of Internal Medicine, University of Michigan Medical School, Ann Arbor, MI <sup>21</sup> Department of Dermatology, Henry Ford Hospital, Detroit, MI <sup>22</sup> Institute for Clinical Molecular Biology, University of Kiel, Germany; <sup>23</sup> Department of General Medicine, University of Kiel, Germany

### **Genetic Analysis of Psoriasis Consortium (GAPC)**

#### **Management Committee**

Richard C Trembath (Chair)<sup>1,2</sup>, Jonathan N Barker<sup>1</sup>, A David Burden<sup>3</sup>, Michael J Cork<sup>4</sup>, Xavier Estivill<sup>5</sup>, Christopher EM Griffiths<sup>6</sup>, Juha Kere<sup>7</sup>, Ross McManus<sup>8,9</sup>, Giuseppe Novelli<sup>10,11</sup>, André Reis<sup>12</sup>, Lena Samuelsson<sup>13</sup>, Joost Schalkwijk<sup>14</sup>, Mona Stähle<sup>15</sup>, Rachid Tazi-Ahnini<sup>4</sup>, Wolfgang Weger<sup>16</sup>, Jane Worthington<sup>17</sup>

KCL group

Michael H Allen<sup>1</sup>, Jonathan N Barker<sup>1</sup>, Francesca Capon<sup>1</sup>, Adrian Hayday<sup>18</sup>, Jo Knight<sup>1,2</sup>, Frank O Nestle<sup>1</sup>, Alexandros Onoufriadis<sup>1</sup>, Catherine H Smith<sup>19</sup>, Richard C Trembath<sup>1,2</sup>, Michael E Weale<sup>1</sup>

AU-Graz group:

Angelika Hofer<sup>16</sup>, Wolfgang Salmhofer<sup>16</sup>, Wolfgang Weger<sup>16</sup>, Peter Wolf<sup>16</sup>

FIN-Helsinki group:

Kati Kainu<sup>20</sup>, Juha Kere<sup>7</sup>, Ulpu Saarialho-Kere<sup>20</sup>, Sari Suomela<sup>20</sup>

GER-Erlangen group:

Petra Badorf<sup>12</sup>, Ulrike Hüffmeier<sup>12</sup>, Werner Kurrat<sup>21</sup>, Wolfgang Küster<sup>22</sup>, Jesús Lascorz<sup>23</sup>, Rotraut Mössner<sup>24</sup>, André Reis<sup>12</sup>, Funda Schürmeier-Horst<sup>25</sup>, Markward Ständer<sup>26</sup>, Heiko Traupe<sup>25</sup>

HOL-Nijmegen group:

Judith G M Bergboer<sup>14</sup>, Martin den Heijer<sup>27</sup>, Joost Schalkwijk<sup>14</sup>, Peter C. van de Kerkhof<sup>14</sup>, Patrick L J M Zeeuwen<sup>14</sup>

IRE-Dublin group (GRIPPsA members are denoted by \*):

Louise Barnes<sup>8,9</sup>, Linda E Campbell<sup>28</sup>, Catriona Cusack<sup>29</sup>, Ciara Coleman<sup>8,9</sup>, Judith Conroy<sup>8,9</sup>, Sean Ennis<sup>8,9</sup>, Oliver Fitzgerald<sup>30\*</sup>, Phil Gallagher<sup>30</sup>, Alan D Irvine<sup>31\*</sup>, Brian Kirby<sup>30\*</sup>, Trevor Markham<sup>29</sup>, WH Irwin McLean<sup>28</sup>, Ross McManus<sup>8,9\*</sup>, Joe McPartlin<sup>8,9</sup>, Sarah F Rogers<sup>30</sup>, Anthony W Ryan<sup>8,9</sup>, Agnieszka Zawirska<sup>30</sup>

ITA-Rome group:

Emiliano Giardina<sup>10</sup>, Tiziana Lepre<sup>10</sup>, Giuseppe Novelli<sup>10,11</sup>, Carlo Perricone<sup>10</sup>

SPA-Barcelona group:

Xavier Estivill<sup>5</sup>, Gemma Martín-Ezquerro<sup>32</sup>, Ramon M Pujol<sup>32</sup>, Eva Riveira-Munoz<sup>5</sup>

SWE-Gothenburg group:

Annica Inerot<sup>33</sup>, Åsa T Naluai<sup>13</sup>, Lena Samuelsson<sup>13</sup>,

SWE-Stockholm group:

Lotus Mallbris<sup>15</sup>, Mona Ståhle<sup>15</sup>, Katarina Wolk<sup>15</sup>

UK-Glasgow group:

A David Burden<sup>3</sup>, Joyce Leman<sup>3</sup>

UK-Manchester group:

Anne Barton<sup>17</sup>, Christopher EM Griffiths<sup>6</sup>, Richard B Warren<sup>6</sup>, Jane Worthington<sup>17</sup>, Helen S Young<sup>6</sup>

UK-Sheffield group:

Michael J Cork<sup>4</sup>, Rachid Tazi-Ahnini<sup>4</sup>

Groningen group (Italian and Dutch controls):

Isis Ricano-Ponce<sup>34</sup>, Gosia Trynka<sup>34</sup>, Cisca Wijmenga<sup>34</sup>

<sup>1</sup>Division of Genetics and Molecular Medicine, King's College London, London, UK; <sup>2</sup>National Institute for Health Research (NIHR), Biomedical Research Centre, Guy's and St. Thomas' NHS Foundation Trust and King's College London, London, UK; <sup>3</sup>Department of Dermatology, Western Infirmary, Glasgow, UK;

<sup>4</sup>Academic Unit of Dermatology Research, Department of Infection and Immunity, The University of Sheffield, Sheffield, UK; <sup>5</sup>Genes and Disease Programme, Centre for Genomic Regulation (CRG) and UPF, Hospital del Mar Research Institute (CRG), and Public Health and Epidemiology Network Biomedical Research Centre (CIBERESP), Barcelona, Spain; <sup>6</sup>Dermatological Sciences, Salford Royal NHS Foundation Trust, University of Manchester, Manchester Academic Health Science Centre, Manchester, UK; <sup>7</sup>Department of Biosciences and Nutrition, Karolinska Institutet, Stockholm, Sweden, and Folkhälsan Institute of Genetics, Helsinki, Finland, and Department of Medical Genetics, University of Helsinki, Finland; <sup>8</sup>Department of Clinical Medicine, Trinity College Dublin, Ireland; <sup>9</sup>Institute of Molecular Medicine, Trinity College Dublin, Ireland <sup>10</sup>National Agency for Evaluation of Universities and Research Institutes (ANVUR); <sup>11</sup>Research Center San Pietro Hospital, Rome, Italy; <sup>12</sup>Institute of Human Genetics, University of Erlangen-Nuremberg, Erlangen, Germany; <sup>13</sup>Department of Medical and Clinical Genetics, Institute of Biomedicine, Sahlgrenska Academy, University of Gothenburg, Gothenburg, Sweden; <sup>14</sup>Department of Dermatology, Radboud University Nijmegen Medical Centre, Nijmegen, The Netherlands; <sup>15</sup>Dermatology Unit, Department of Medicine, Karolinska Institutet, Stockholm, Sweden; <sup>16</sup>Department of Dermatology, Medical University of Graz, Graz, Austria; <sup>17</sup>Arthritis Research UK Epidemiology Unit, University of Manchester, Manchester Academic Health Science Centre, Manchester, UK; <sup>18</sup>Division of Immunology, Infection and Inflammatory Disease; King's College London, London, UK; <sup>19</sup>St John's Institute of Dermatology, King's College London, London, UK; <sup>20</sup>Department of Dermatology and Venerology, University of Helsinki, Helsinki, Finland; <sup>21</sup>Asklepios Nordseeklinik, Westerland/Sylt, Germany; <sup>22</sup>TOMESA Clinics, Bad Salschlirf, Germany; <sup>23</sup>Division of Molecular Genetic Epidemiology, German Cancer Research Center (DKFZ), Heidelberg, Germany; <sup>24</sup>Department of Dermatology, University of Göttingen, Göttingen, Germany; <sup>25</sup>Department of Dermatology, University of Münster, Münster, Germany; <sup>26</sup>Psoriasis Rehabilitation Hospital, Bad Bentheim, Germany; <sup>27</sup>Department of Endocrinology and Department of Epidemiology and Biostatistics, Radboud University Nijmegen Medical Centre, Nijmegen, The Netherlands; <sup>28</sup>University of Dundee, Dundee, UK; <sup>29</sup>University College Hospital Galway, Galway, Ireland; <sup>30</sup>St Vincent's University Hospital, Dublin, Ireland; <sup>31</sup>Department of Clinical Medicine, Trinity College Dublin, Our Lady's Children's Hospital Crumlin, Dublin, Ireland; <sup>32</sup>Dermatology Service, Hospital del Mar-IMAS, Barcelona, Spain; <sup>33</sup>Department of Dermatology and Venereology, Sahlgrenska University Hospital, Gothenburg, Sweden; <sup>34</sup>Genetics Department, University Medical Center Groningen and the University of Groningen, the Netherlands

## **Psoriasis Association Genetics Extension (PAGE)**

### University of Michigan (UMich)

James T Elder<sup>1,2</sup>, Philip E Stuart<sup>1</sup>, Rajan P Nair<sup>1</sup>, Trilokraj Tejasvi<sup>1</sup>, Johann E. Gudjonsson<sup>1</sup>, John J Voorhees<sup>1</sup>

Lam C Tsoi<sup>3</sup>, Jun Ding<sup>3</sup>, Yanming Li<sup>3</sup>, Hyun M Kang<sup>3</sup>, Goncalo R Abecasis<sup>3</sup>

### Christian-Albrechts-University (CAU) of Kiel

Andre Franke<sup>4</sup>, Eva Ellinghaus<sup>4</sup>, Stefan Schreiber<sup>4</sup>, Ulrich Mrowietz<sup>5</sup>, Stephan Weidinger<sup>5</sup>, Michael Weichenthal<sup>5</sup>, Sören Mucha<sup>4</sup>

### University of Toronto (UToronto)

Dafna D Gladman<sup>6</sup>, Fawnda J Pellett<sup>6</sup>, Vinod Chandran<sup>6</sup>, Cheryl F Rosen<sup>7</sup>

### Memorial University (MU)

Proton Rahman<sup>8</sup>

### University of Tartu (UTartu) and Estonian Genome Center University of Tartu (EGCUT)

Sulev Koks<sup>9</sup>, Külli Kingo<sup>10</sup>, Tonu Esko<sup>11</sup>, Andres Metspalu<sup>11</sup>

The Feinstein Institute for Medical Research (FIMR)

Peter Gregersen<sup>12</sup>

National Psoriasis Victor Henschel BioBank (NPF)

Andrew Henschel<sup>13</sup>, Marin Aurand<sup>13</sup>, Bruce Bebo<sup>13</sup>

Collaborative Research in the Region of Augsburg (KORA)

please see below for KORA membership

Heinz Nixdorf Recall (Risk Factors, Evaluation of Coronary Calcification, and Lifestyle) study (HNR)

please see below for HNR membership

Henry Ford Hospital (HFH)

Henry W Lim<sup>14</sup>

<sup>1</sup>Department of Dermatology, University of Michigan Ann Arbor, MI 48109, USA; <sup>2</sup>Ann Arbor Veterans Affairs Hospital, Ann Arbor, MI 48105 USA; <sup>3</sup>Department of Biostatistics, Center for Statistical Genetics, University of Michigan Ann Arbor, MI 48109, USA; <sup>4</sup>Institute of Clinical Molecular Biology, Christian-Albrechts-University of Kiel, 24105 Kiel, Germany; <sup>5</sup>Department of Dermatology, University Hospital, Schleswig-Holstein, Christian-Albrechts-University of Kiel, 24105 Kiel, Germany; <sup>6</sup>Department of Medicine, Division of Rheumatology, University of Toronto, Toronto Western Hospital, Toronto, Ontario M5T 2S8, Canada; <sup>7</sup>Department of Medicine, Division of Dermatology, University of Toronto, Toronto Western Hospital, Toronto, Ontario M5T 2S8; <sup>8</sup>Department of Medicine, Memorial University, St. John's, Newfoundland A1C 5B8, Canada; <sup>9</sup>Department of Physiology, Centre of Translational Medicine and Centre for Translational Genomics, University of Tartu, 50409 Tartu, Estonia; <sup>10</sup>Department of Dermatology and Venerology, University of Tartu, 50409 Tartu, Estonia; <sup>11</sup>Estonian Genome Center and Center of Translational Genomics; Estonian Biocenter; Institute of Molecular and Cell Biology, University of Tartu, 50409 Tartu, Estonia; <sup>12</sup>Robert S. Boas Center for Genomics and Human Genetics, The Feinstein Institute for Medical Research, Manhasset, NY 11030; <sup>13</sup>National Psoriasis Foundation, Portland, OR 97223 USA; <sup>14</sup>Henry Ford Hospital, Detroit, Michigan, 48202, USA

**Cooperative Research in the Region of Augsburg (KORA)**

H. Erich Wichmann<sup>1,2,3</sup>, Christian Gieger<sup>4</sup>, Thomas Illig<sup>5</sup>, Juliane Winkelmann<sup>6,7,8</sup>,

<sup>1</sup>Institute of Epidemiology I, Helmholtz Centre Munich, German Research Center for Environmental Health, 85764 Neuherberg, Germany; <sup>2</sup>Institute of Medical Informatics, Biometry and Epidemiology, Ludwig-Maximilians-University, 81377 Munich, Germany; <sup>3</sup>Klinikum Grosshadern, 81377 Munich, Germany; <sup>4</sup>Institute of Genetic Epidemiology, Helmholtz Centre Munich, German Research Center for Environmental Health, 85764 Neuherberg, Germany; <sup>5</sup>Research Unit Molecular Epidemiology, Helmholtz Centre Munich, German Research Center for Environmental Health, 85764 Neuherberg, Germany; <sup>6</sup>Department of Neurology, Technische Universität München, Munich, Germany; <sup>7</sup>Institute of Human Genetics, Technische Universität München, Munich, Germany; <sup>8</sup>Institute of Human Genetics, Helmholtz Zentrum Munich, German Research Center for Environmental Health, Munich, Germany;

**Heinz Nixdorf Recall (Risk Factors, Evaluation of Coronary Calcification, and Lifestyle) study (HNR)**

Susanne Moebus<sup>1</sup>, Karl-Heinz Jöckel<sup>1</sup>, Raimund Erbel<sup>2</sup>, Markus M. Nöthen<sup>3,4</sup>

<sup>1</sup>Institute for Medical Informatics, Biometry and Epidemiology (IMIBE), University of Duisburg-Essen, Hufelandstr. 55, 45122 Essen, Germany; <sup>2</sup>Clinic of Cardiology, West German Heart Centre, University Hospital of Essen, University Duisburg-Essen, Essen, Germany; <sup>3</sup>Institute of Human Genetics, University of Bonn, Bonn, Germany; <sup>4</sup>Department of Genomics, Life & Brain Center, University of Bonn, Bonn, Germany
